# Supplementary material
Source: publisher figshare collection journal article supplement (https://tandf.figshare.com/ndownloader/files/14810306)
Supplement: Supplementary file 1 [file 14810306]

## Sheet: Blad1
Supplemental Table 4. Experimental studies in adults
Drug	Rationale	Effect	Status
Obeticholid acid164	FXR-agonist, involved in lipid and glucose homoeostasis, bacterial flora growth and inflammation	Improvement in NASH and fibrosis in phase 2 trial	Phase 3
Elafibrinor165	PPARα/δ agonist, involved in regulating gluconeogenesis, β-oxidation, lipid transport	Improvement in NASH and fibrosis in phase 2 trial	Phase 3
Selonsertib166	AKS1 inhibitor	Additive effect on reduction of fibrosis during treatment with simtuzumab in phase 2 trial	Phase 3
Cenicriviroc167	Chemokine receptor inhibitor, prevents hepatic infiltration of macrophages	Improvement in NASH	Phase 3
Liraglutide168	Glucagon-like peptide analogue, improves hepatic insulin sensitivity	Resolution of NASH	Phase 3
